# Supplementary material for: An assessment of the impact of extraction and digestion protocols on multiplexed targeted protein quantification by mass spectrometry for egg and milk allergens
Source: PubMed Central journal article supplement (PMC6571087; doi:10.1007/s00216-019-01816-z), 2019-05-28
Supplement: 216_2019_1816_MOESM1_ESM.pdf [file 216_2019_1816_MOESM1_ESM.pdf]

**Analytical and Bioanalytical Chemistry**

**Electronic Supplementary Material**

**An assessment of the impact of extraction and digestion protocols on multiplexed-targeted protein quantification by mass spectrometry for egg and milk allergens**

Chiara Nitride, Jørgen Nørgaard, Jone Omar, Hendrik Emons, María-José Martínez Estesó, Gavin O'Connor

## **S1 Recipe for the cookies analysed for milk and to make 1 kg of cookie dough**

### *Ingredients*

Peanut flour 10.8 g  
Hazelnut flour 19.5 g  
Skimmed milk powder (SMP) 14.4 g  
Instant egg white powder (EWP) 7 g  
Biscuit flour 481 g  
Biscuit fat 168.6 g  
Icing sugar 154.4 g  
Salt 5.5 g  
Sodium bicarbonate 1.8 g  
Ammonium bicarbonate 1.1 g  
Water 135.9 g

### *Preparation*

The biscuit fat and icing sugar were first mixed until it formed a smooth paste. The sodium bicarbonate, ammonium bicarbonate and salt were added to the water. The solution was then added to the sugar/fat paste. The peanut flour, hazelnut flour, SMP and EWP were thoroughly mixed with 48 g of the biscuit flour. Once thoroughly mixed the remaining flour was added and mixed thoroughly. The flour was slowly added to water paste and mixed using paddle mixer until a dough was formed.

The resulting dough was rolled to an even thickness of 1.5 mm and was then cut into 2.54 cm squares. The biscuits were placed on greaseproof paper and baked in an oven for 9 min at 150 °C and 10% humidity.

**Fig. S1** Flowchart representing the buffering systems, the chaotropics and reducing agents used in the extraction screening

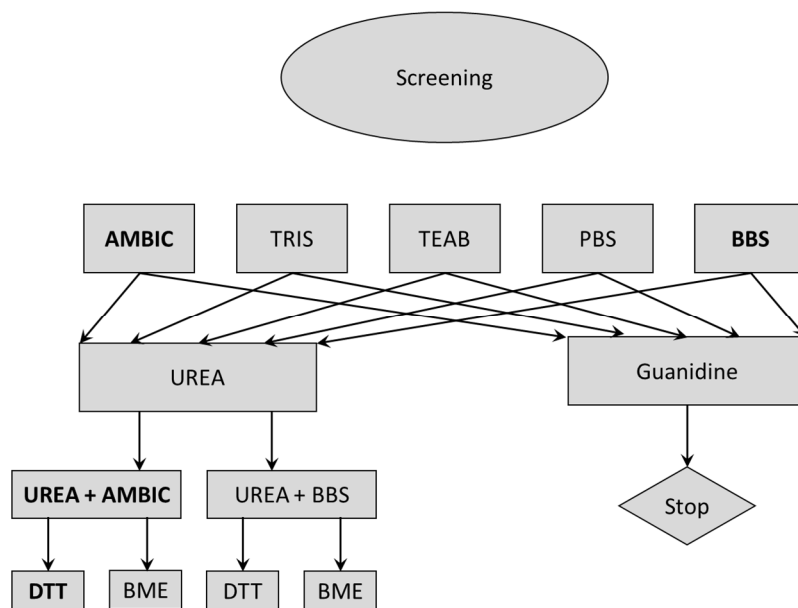

**Fig. S2** Combined SRM chromatograms for the selected milk and egg peptides from a trypsin digestion of a cookie extract

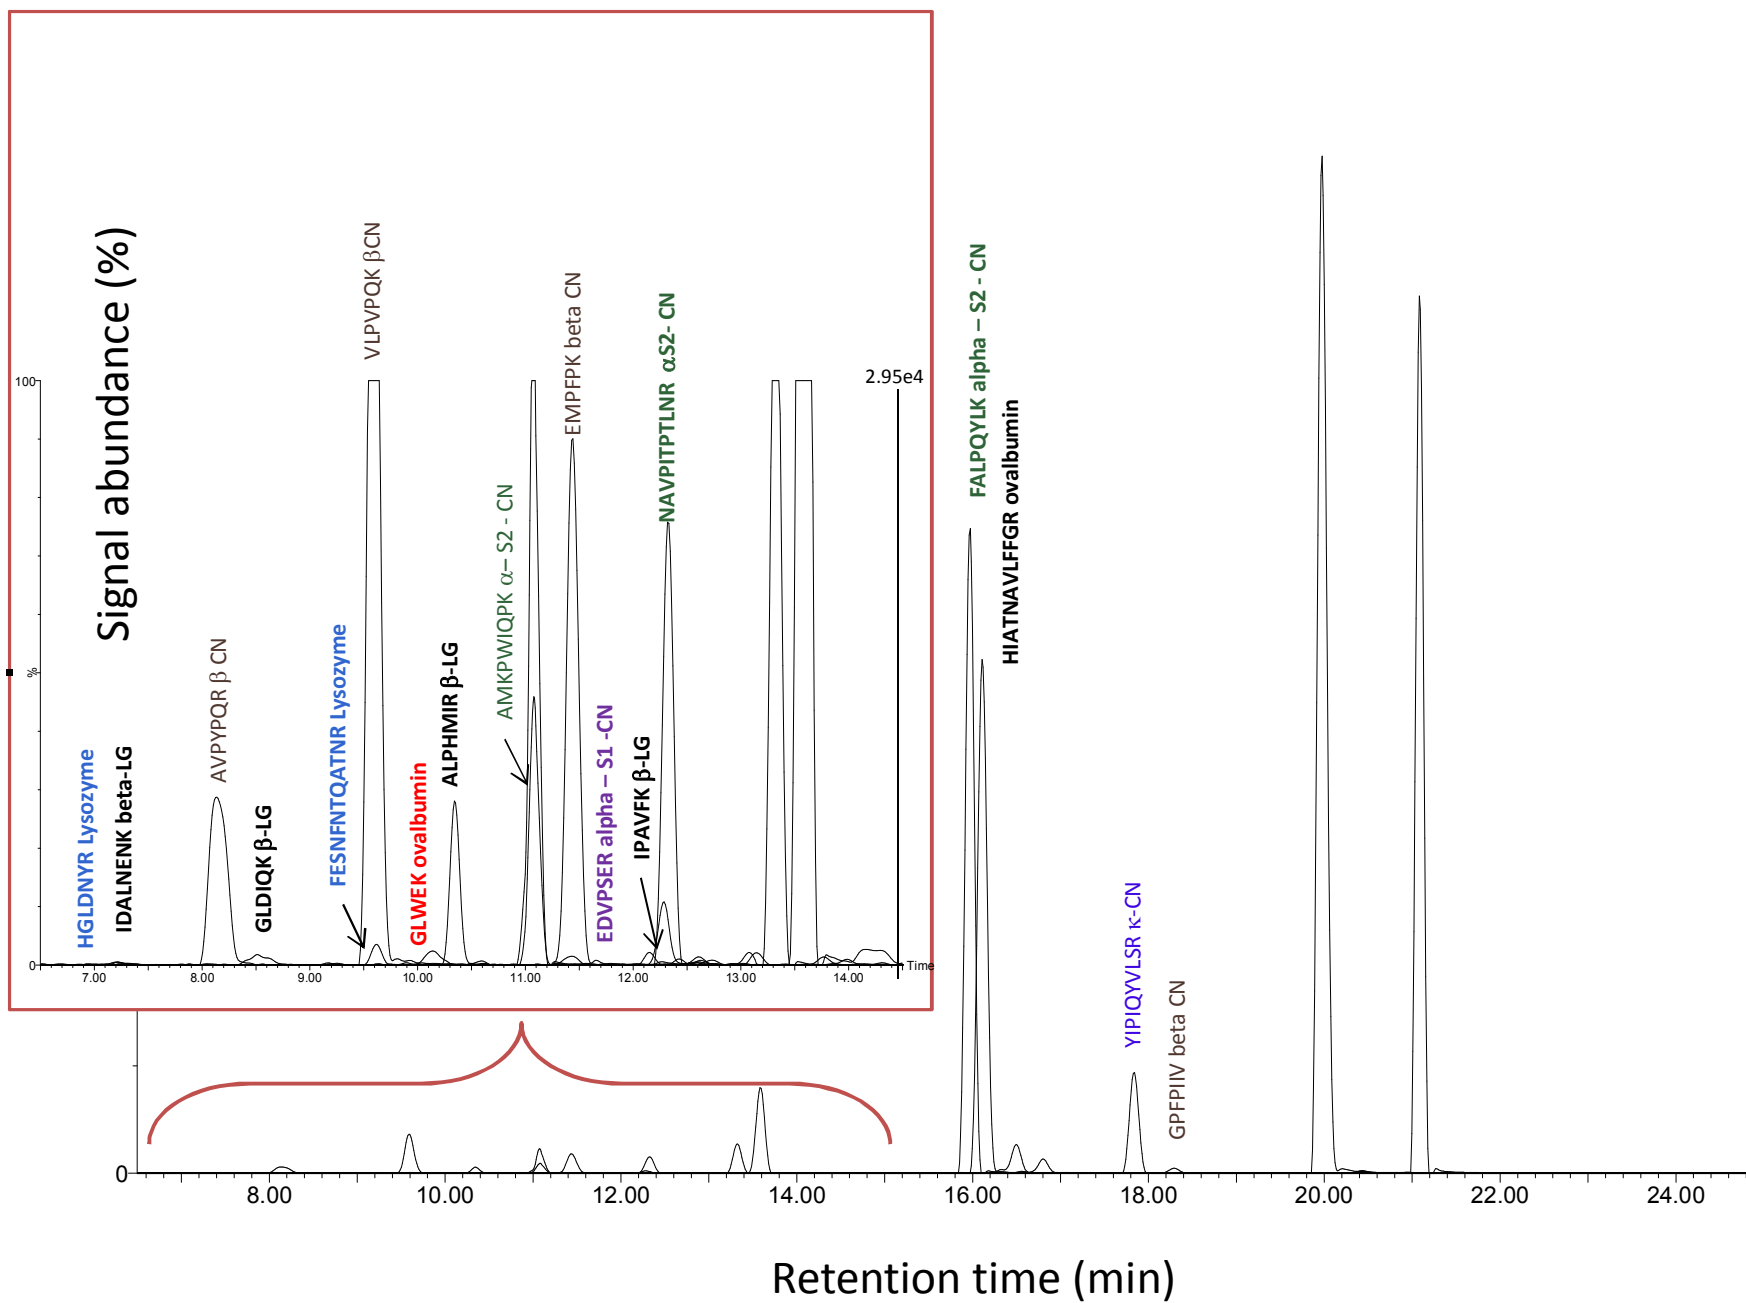

**Fig. S3** Graphic comparison of the estimated total protein concentration (expressed as  $\mu\text{g}$  of total protein per mL of extract) determined using the RCDC™ protein assay. (a) Extraction with buffer only, (b) extraction with chaotropic agent, (c) extraction with chaotropic and reducing agent. Error bars represent the standard deviation of 3 replicate measurements

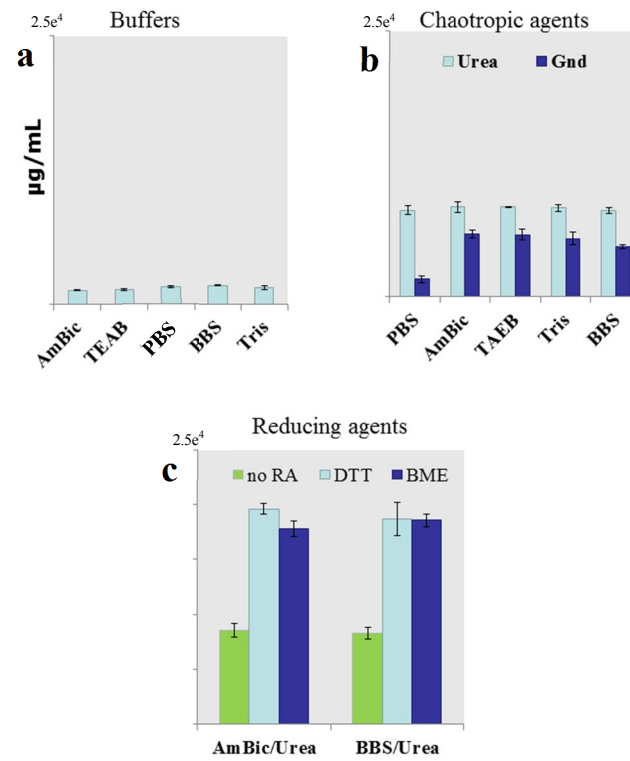

**Fig. S4** Graph comparison of the SRM peak area ratios of the milk derived peptides released after digesting proteins extracted from the biscuits using two chaotropic agents  Guanidine and  Urea. Error bars represent the standard deviation of 3 replicate measurements

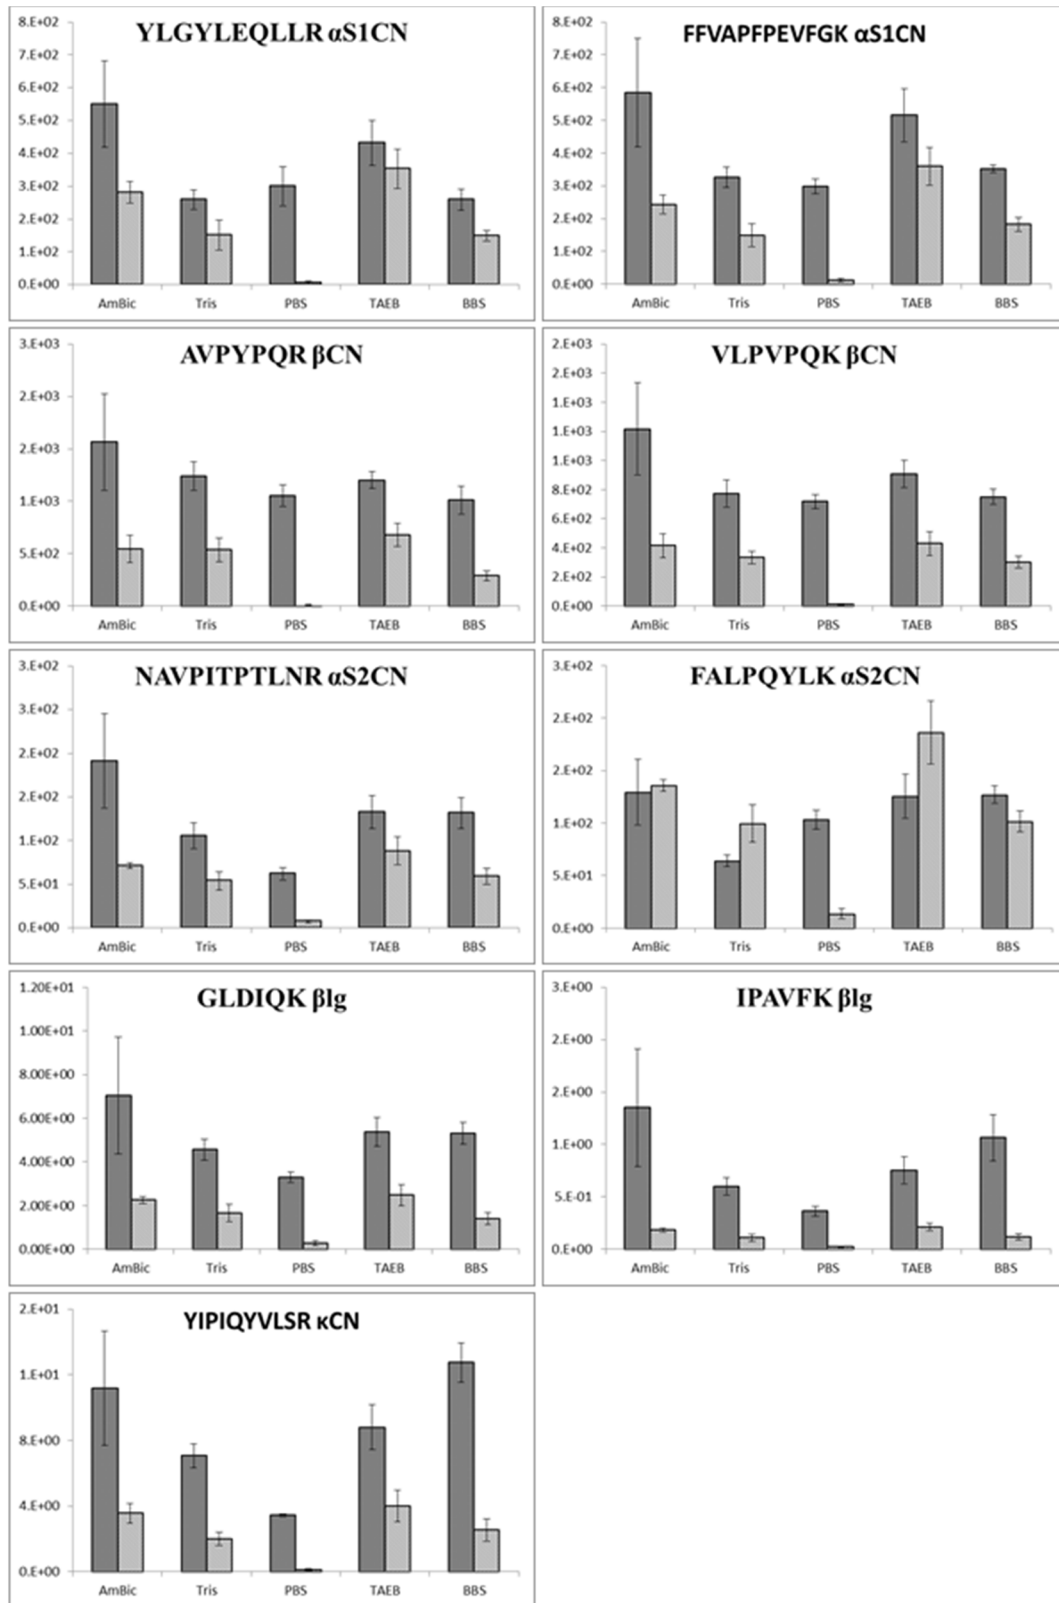

**Fig. S5** Graph comparison of the SRM peak areas of the egg white derived peptides released after digesting proteins extracted from the biscuits using two chaotropic agents  Guanidine  Urea. Error bars represent the standard deviation of 3 replicate measurements

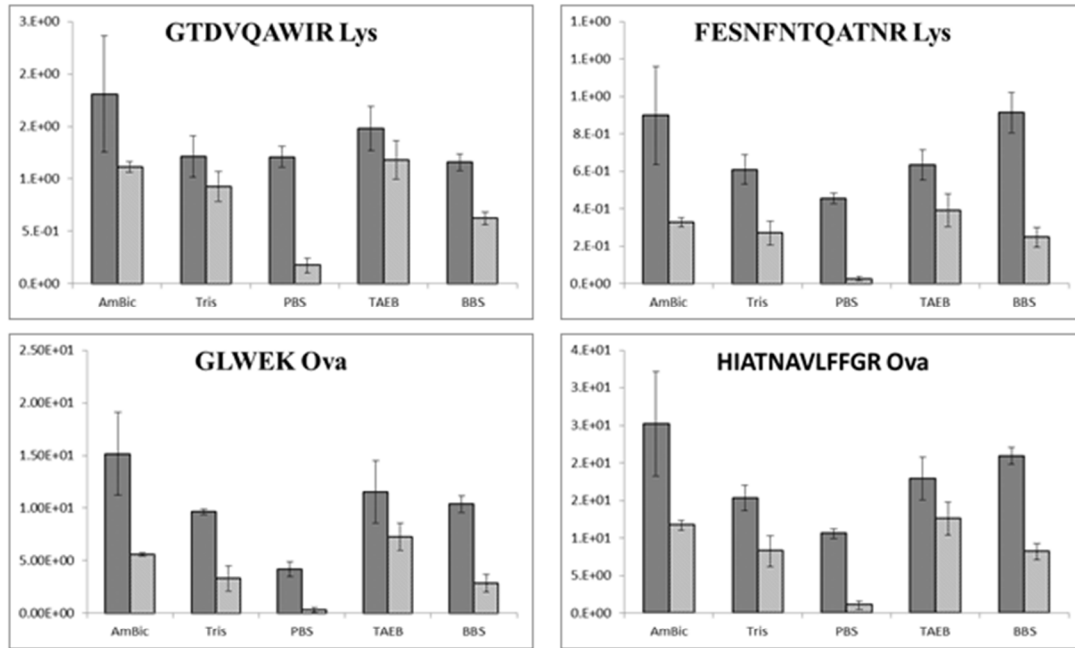

**Fig. S6** Graph comparison of the SRM peak areas of the milk derived peptides released after digesting proteins extracted from the biscuits  $\square$  w/o reducing agent and with  $\blacksquare$  5% DTT or with  $\blacksquare$  5% BME. Error bars represent the standard deviation of 3 replicate measurements

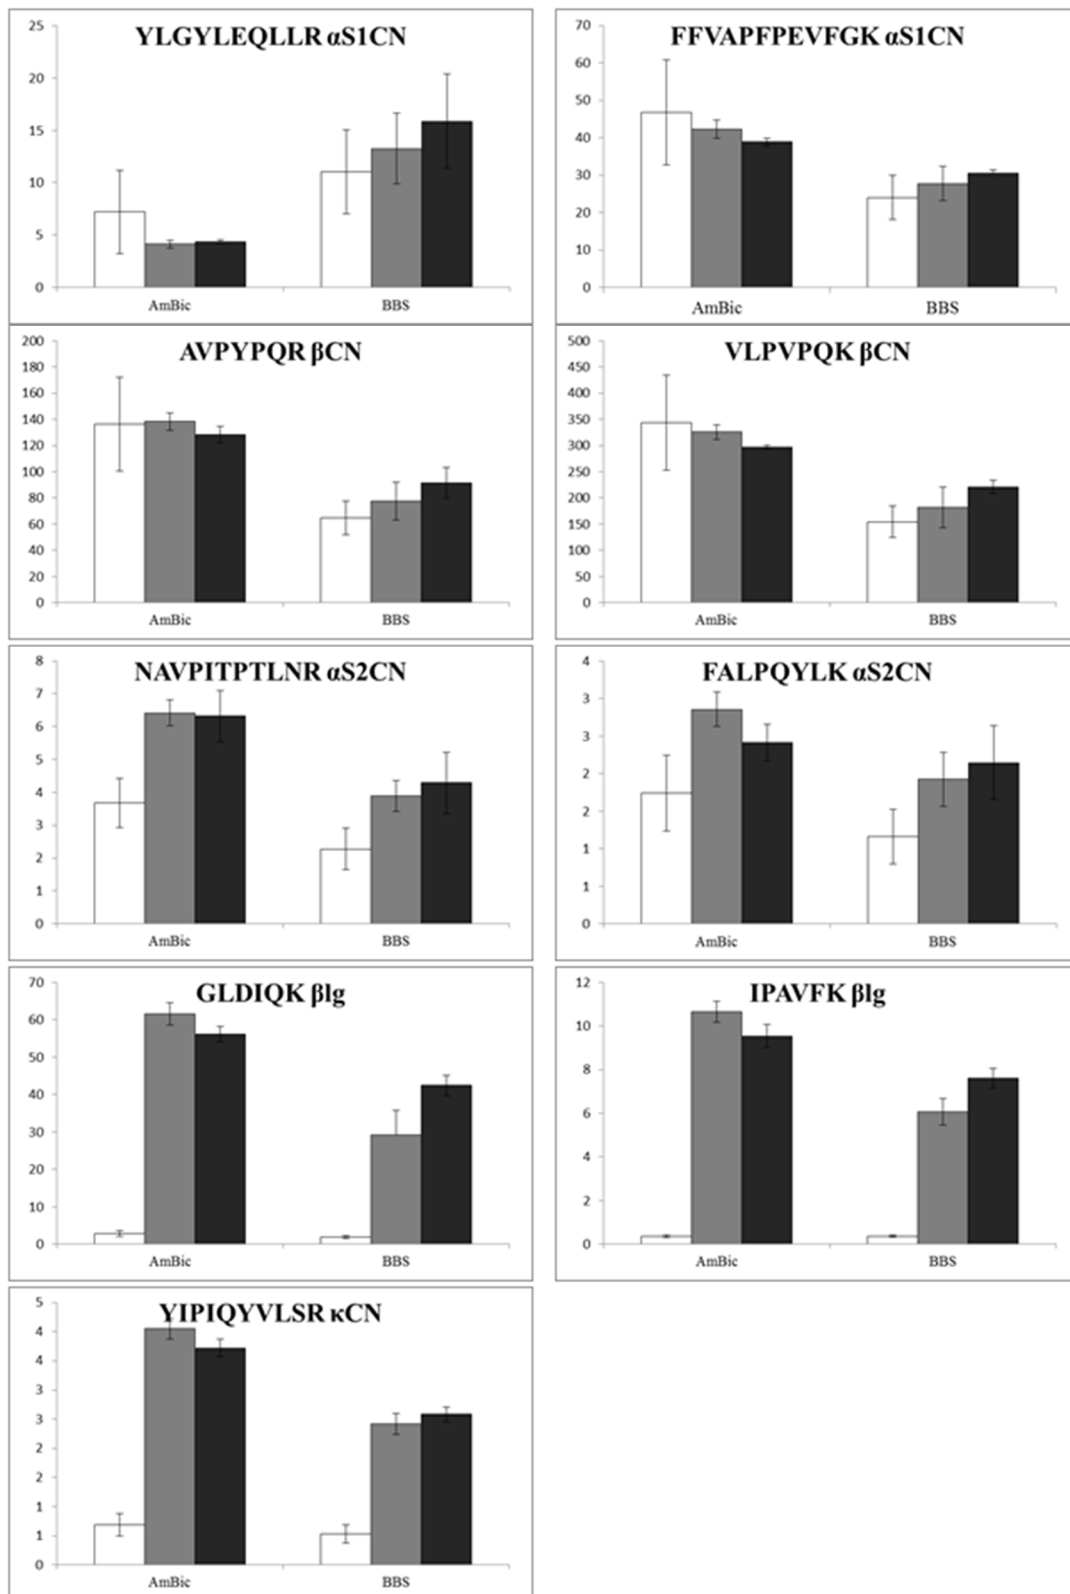



**Fig. S7** Graph comparison of the SRM peak areas of the egg white derived peptides released after digesting proteins extracted from the biscuits  w/o reducing agent and with  50 mmol L<sup>-1</sup> DTT or with  5% BME. Error bars represent the standard deviation of 3 replicate measurements

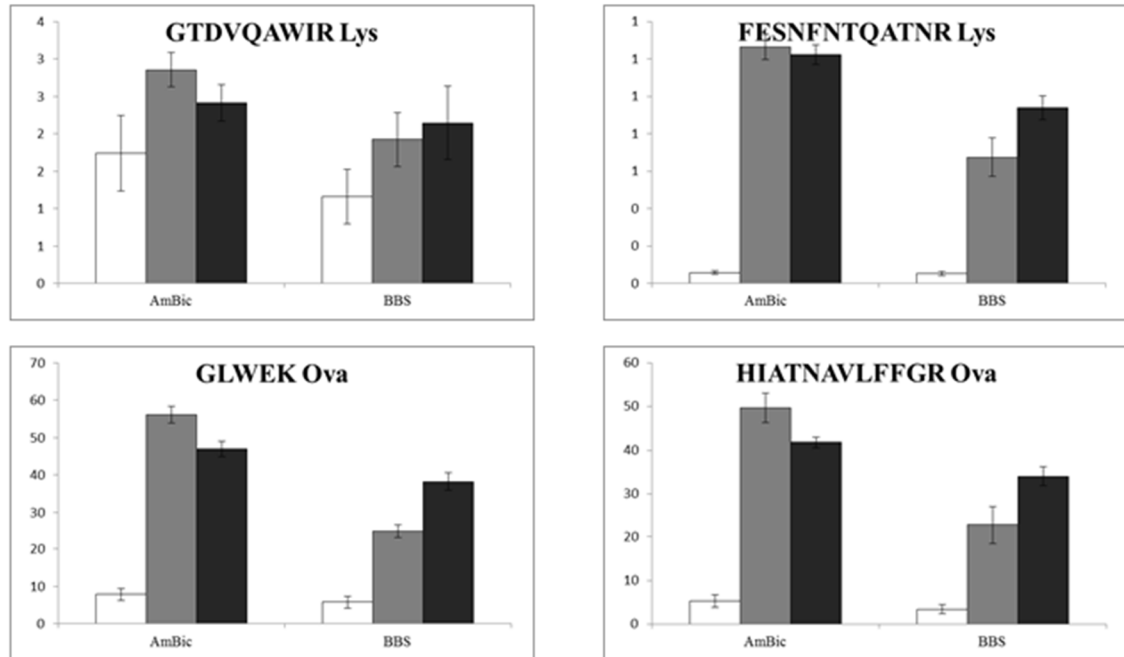

**Fig. S8** Flowchart used for the optimisation of extraction and digestion protocols

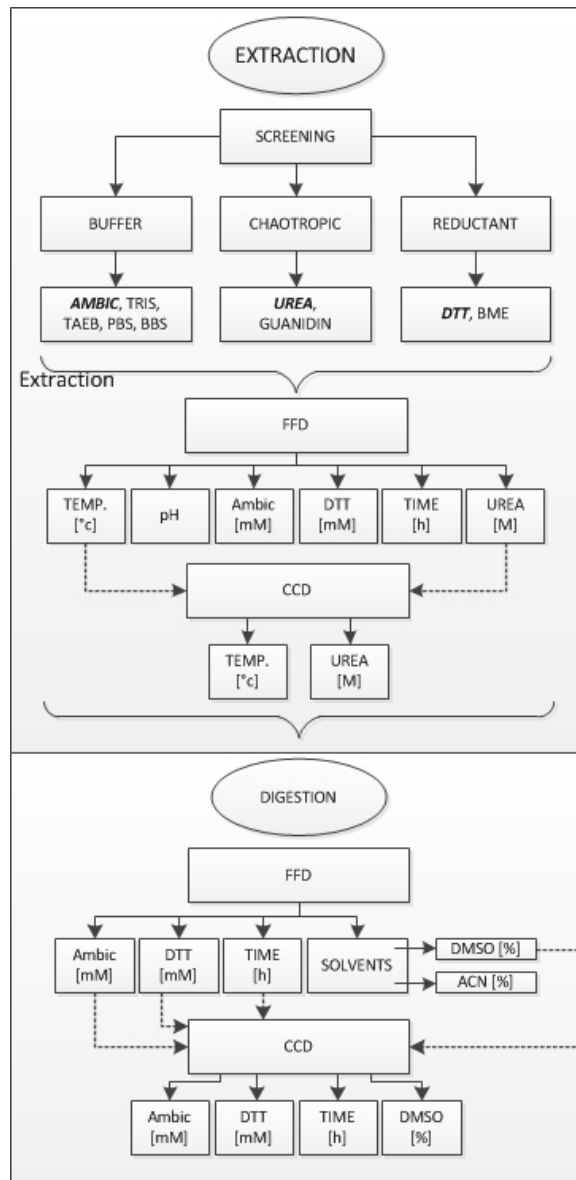

**Fig. S9** Surface plots showing the effects of Urea concentration and temperature on the extractability of the proteins. The protein concentration (expressed as  $\mu\text{g}$  of total protein extracted from 0.5 g of biscuits) was estimated using the RCDC™ protein assay

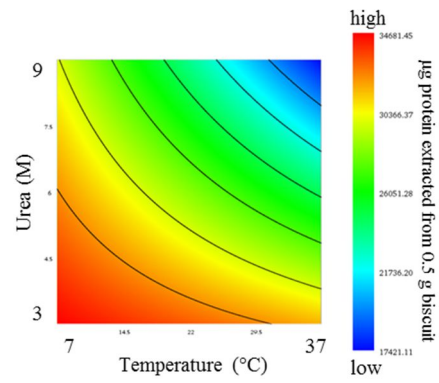

**Fig. S10** Surface plots showing the effects of Urea concentration (B) and temperature (A) (p-level < 0.05) on the peak area of the peptides. Panel a)  $\beta$  LG-IPAVFK; b)  $\beta$  CN-VLPVPQK; c) Ova – GLWEK; d) Ova – LYAEER; e) Ova - VASMASEK; f) Lys- HGLD-NYR; g); Lys- GTDVQAWIR

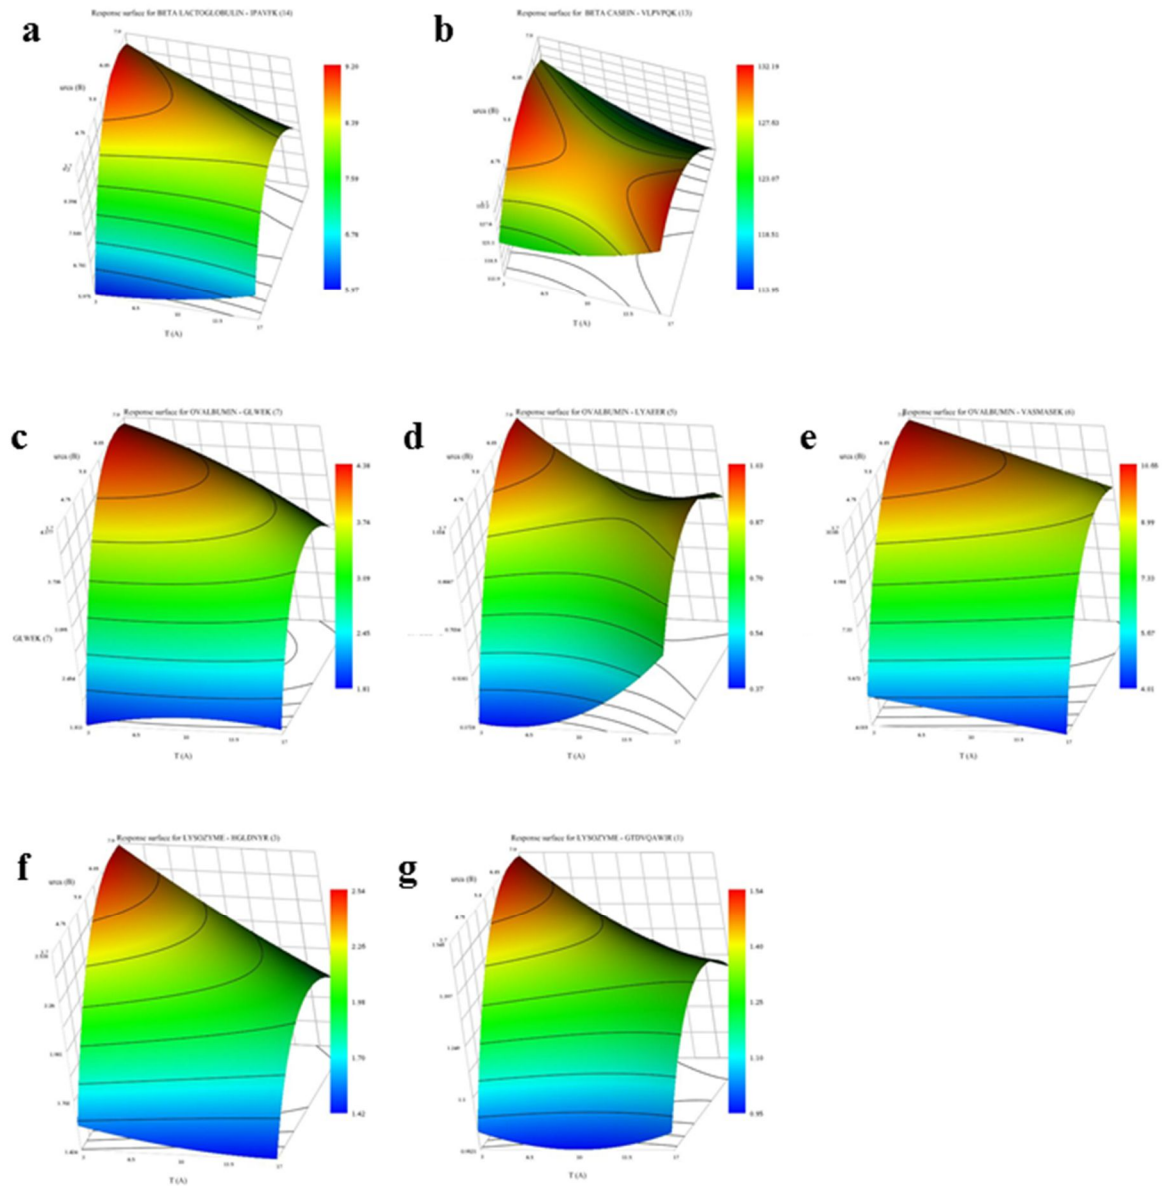

**Fig. S11** Surface plots showing the effects of the statistically significant variables ( $p$ -level < 0.05) on the peak area of the peptides. Panel a)  $\alpha$  S2 CN- ALNEINQFYQK; c)  $\alpha$  S1 CN- YLGYLEQLLR; d)  $\beta$  CN-VLPVPQK; e) Ova- GLWEK; f) Ova- HIATNAVLFVFR; g) Lys- FESNFNTQATNR

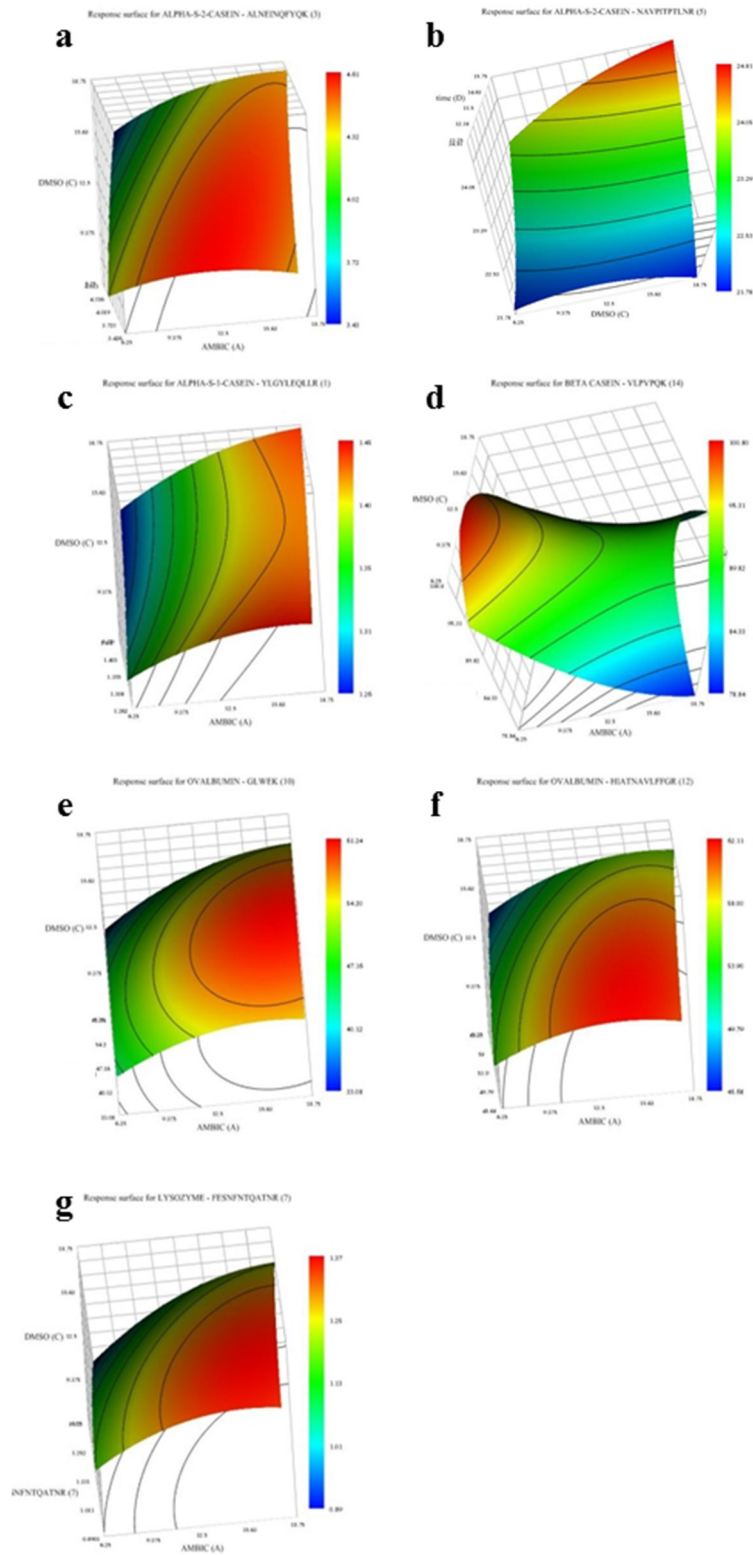

**Fig. S12** Profile of marker peptides released under optimised digestion conditions over 35 hours of digestion. The addition of trypsin was static and multiple. Static addition of trypsin was performed only at time 0 hours at two E:S ratios - 1:50 and 1:100. Multiple additions of trypsin were performed at equidistant intervals of time to a final 1:25 (E:S) ratio - 1:50 (E:S) ratio was added at time 0 and time 22 hours; 1:100 (E:S) ratio was added at time 0, 6, 12 and 22 hours. Error bars represent the standard deviation of 3 replicate measurements. Panel a)  $\alpha$  S2 CN- NAVPITPTLNR; b)  $\alpha$  S2 CN- ALNEINQFYQK; c)  $\alpha$  S2 CN- VIPYVR; d)  $\beta$  LG- IPAVFK; e)  $\beta$  LG- ALPHMIR; f)  $\beta$  LG- GLDIQK; g)  $\alpha$  S1 CN- FFVAPFPEVFGK; h)  $\kappa$  CN - YIPIQYVLSR ; i)  $\beta$  CN- VLPVPQK ; j)  $\beta$  CN- AVPYPQR; k) Ova- GLWEK; l) Ova- HIATNAVLFFGR; m) Lys- HGLDNYR; n) Lys- GTDVQAWIR

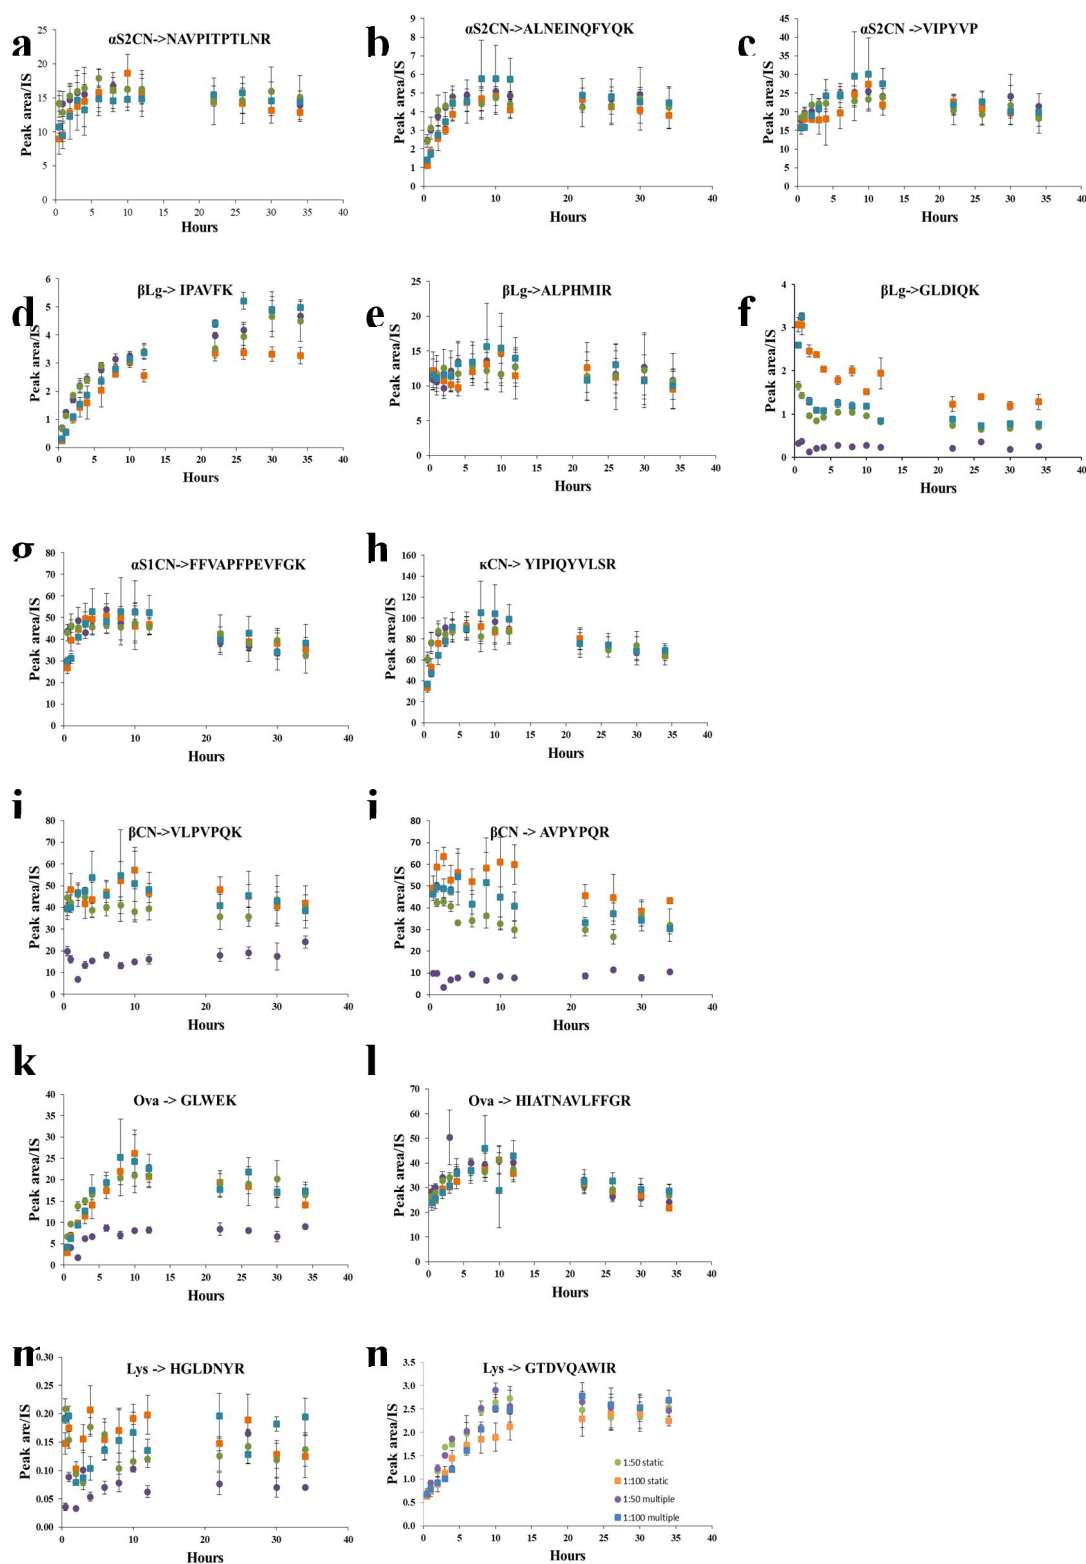

**Table S1** List of MS-Homology blast hits that produce significant alignments with our query sequences

| Protein | Peptide      | Uniqueness | BLAST                                     |
|---------|--------------|------------|-------------------------------------------|
| αS1     | EDVPSEER     | Milk       | P02662 O62823 P18626 P04653               |
|         | YLGYLEQLLR   | Milk       | P02662 B6ZBP2 D3TU01 Q69EZ6               |
|         | FFVAPFPEVFGK | Milk       | P02662 Q4F6X6 Q865A0 D3TJU0               |
| αS2     | NAVITPTLNR   | Cow Milk   | P02663                                    |
|         | AMKPWIQPK    | Cow Milk   | P02663                                    |
|         | FALPQYLK     | Cow Milk   | P02663                                    |
|         | VIPYVR       | No         | P02663 Q9FS88 O74773 A3QK15               |
|         | ITVDDK       | No         | P02663 P33049 P04654 P23458 P34544 B4SJW7 |
|         | ALNEINQFYQK  | Milk       | P02663 P33049 P04654                      |
| βCn     | AVPYPQR      | Milk       | P02666 Q9TSI0                             |
|         | EAMAPK       | No         | P02666 Q9TSI0 Q2HGJ1                      |
|         | EMFPFK       | Milk       | P02666 Q9TSI0 P33048 P11839               |
|         | VLPVPQK      | Milk       | P02666 Q9TSI0 P33048 P11839               |
|         | GPFPIIV      | No         | P02666 Q9TSI0 T0IJL6 W4EZJ2 D2QIT4        |
| βLg     | IDALNENK     | Milk       | P02754 P02755 P02756 P67975 P67976        |
|         | GLDIQK       | Cow Milk   | P02754                                    |
|         | ALPMHIR      | Milk       | P02754 P02755 P02756 P67975 P67976        |
|         | IPAVFK       | Milk       | P02754 P02755 P02756 P67975 P67976        |
|         | TPEVDDEALEK  | Milk       | P02754 P02755                             |
| κCn     | YIPIQYVLSR   | Milk       | P02668 P11840 P42156 P02670 P50420 P50421 |
| Ova     | LYAEER       | Hen Egg    | P01012                                    |
|         | GLWEK        | No         | P01012 GIMYK6 P19104 E2RVI8               |
|         | VASMASEK     | Egg        | P01012 Q6V115 P19104 O73860               |
|         | HIA TNAVLFGR | Hen Egg    | P01012                                    |
| Lys     | HGLDNYR      | Egg        | P00698 P00699 P00700 P00704               |
|         | FESNFNTQATNR | Egg        | P00698 P00701                             |
|         | GTDVQAWIR    | Egg        | P00698 P00700 Q7LZI3                      |

**Table S2** Overview of 19 peptides from the 5 cow milk proteins and two hen egg white proteins, of the product ions, cone voltage (V) and collision energies (eV) used for the SRM

| Protein        | Peptide          | MW (Da) | Parent (Da) | Daughter (Da) |           | Cone (V) | Coll (eV) |
|----------------|------------------|---------|-------------|---------------|-----------|----------|-----------|
| <b>α S1 CN</b> | YLGYLEQLLR       | 1267.7  | 634.4       | 334.2         | b3        | 25       | 20        |
|                |                  |         |             | 771.5         | y6        |          | 18        |
|                |                  |         |             | 991.6         | y8        |          | 20        |
|                | FFVAPFPEVFGK     | 1384.7  | 692.9       | 465.2         | b4        | 25       | 12        |
|                |                  |         |             | 920.5         | y8        |          | 18        |
|                |                  |         |             | 991.5         | y9        |          | 18        |
| <b>α S2 CN</b> | VIPYVR           | 746.5   | 373.7       | 437.3         | y3        | 15       | 15        |
|                |                  |         |             | 534.3         | y4        |          | 8         |
|                |                  |         |             | FALPQYLK      | 979.6     | 490.3    | 648.4     |
|                |                  | 761.5   | y6          |               |           | 12       |           |
| 1195.7         | 598.3            | 285.2   | b3          |               | 15        | 15       |           |
|                | ALNEINQFYQK      | 1367.7  | 684.4       | 428.2         | b4        | 15       | 20        |
|                |                  |         |             | 827.4         | y6        |          | 20        |
|                |                  |         |             | <b>β CN</b>   | VLPVPQK   | 780.5    | 390.8     |
| 372.2          | y3               |         | 15          |               |           |          |           |
| 568.3          | y5               |         | 8           |               |           |          |           |
|                | AVPYPQR          | 830.5   | 415.7       | 400.2         | y3        | 20       | 15        |
|                |                  |         |             | 563.3         | y4        |          | 15        |
|                |                  |         |             | 660.3         | y5        |          | 10        |
| <b>κ CN</b>    | YIPIQVLSR        | 1251.7  | 626.4       | 637.4         | y5        | 25       | 20        |
|                |                  |         |             | 765.4         | y6        |          | 20        |
|                |                  |         |             | 975.6         | y7        |          | 20        |
| <b>β LG</b>    | GLDIQK           | 673.4   | 337.2       | 388.3         | y3        | 25       | 10        |
|                |                  |         |             | 503.3         | y4        |          | 8         |
|                |                  |         |             | 527.3         | b6        |          | 10        |
|                | IPAVFK           | 674.4   | 337.7       | 294.2         | y2        | 25       | 15        |
|                |                  |         |             | 393.2         | y3        |          | 12        |
|                |                  |         |             | 464.3         | y4        |          | 10        |
|                | ALPMHIR          | 837.5   | 419.2       | 327.2         | y5+2      | 26       | 8         |
|                |                  |         |             | 425.3         | y3        |          | 15        |
|                |                  |         |             | 556.3         | y4        |          | 15        |
|                | LYAEER           | 780.4   | 390.7       | 304.2         | y2        | 12       | 18        |
|                |                  |         |             | 504.2         | y4        |          | 10        |
|                |                  |         |             | 667.3         | y5        |          | 12        |
|                | GLWEK            | 632.3   | 316.7       | 276.2         | y2        | 10       | 12        |
|                |                  |         |             | 462.2         | y3        |          | 8         |
|                |                  |         |             | HIATNAVLFFGR  | 1345.7    | 449.3    | 526.3     |
|                |                  | 608.3   | b6          |               |           | 10       |           |
|                |                  | 639.4   | y5          |               |           | 10       |           |
|                | VASMASEK         | 823.0   | 411.7       | 434.2         | y4        | 14       | 12        |
|                |                  |         |             | 565.3         | y5        |          | 10        |
|                |                  |         |             | <b>Lys</b>    | GTDVQAWIR | 1045.5   | 523.3     |
| 545.3          | y4               |         | 15          |               |           |          |           |
| 673.4          | y5               |         | 15          |               |           |          |           |
|                | FESNFNTQATNR     | 1428.7  | 714.8       | 461.2         | y4        | 25       | 20        |
|                |                  |         |             | 589.3         | y5        |          | 20        |
|                |                  |         |             | 690.4         | y6        |          | 22        |
|                | HGLDNYR          | 874.4   | 437.7       | 452.2         | y3        | 25       | 18        |
|                |                  |         |             | 680.3         | y5        |          | 15        |
|                |                  |         |             | 737.4         | y6        |          | 12        |
| Protein        | Labelled Peptide | MW (Da) | Parent (Da) | Daughter (Da) |           | Cone (V) | Coll (eV) |
| <b>α S1 CN</b> | YLGYLEQLLR*      | 1276.7  | 639.4       | 1001.6        |           | 25       | 20        |
| <b>α S2 CN</b> | FALPQYLK*        | 984.6   | 494.4       | 656.2         |           | 15       | 12        |
| <b>Ova</b>     | LYAEER*          | 789.4   | 395.7       | 514           |           | 12       | 18        |
| <b>Lys</b>     | FESNFNTQATNR*    | 1437.7  | 719.8       | 471.1         |           | 25       | 20        |



**Table S3** Individual p-values for the Full Factorial Design of the extraction

|                   | <b>αS2CN-VIPYVP</b>       | <b>αS2CN-ALNEINQFYQK</b> | <b>αS2CN-NAVPIPTLNR</b> | <b>αS2CN-FALPQYLK</b> |
|-------------------|---------------------------|--------------------------|-------------------------|-----------------------|
| <i>AmBic</i> (mM) |                           |                          |                         |                       |
| <i>pH</i>         |                           |                          |                         |                       |
| <i>T</i> (°C)     | 0.0006                    | 0.0179                   | 0.0324                  | 0.0037                |
| <i>Urea</i> (M)   |                           | 0                        | 0                       | 0.0900                |
| <i>Time</i> (h)   |                           |                          |                         |                       |
| <i>DTT</i> (mM)   |                           |                          |                         |                       |
|                   |                           |                          |                         |                       |
|                   | <b>βLG-IPAVFK</b>         | <b>βLG-ALPHMIR</b>       | <b>βLG-GLDIQK</b>       |                       |
| <i>AmBic</i> (mM) |                           |                          |                         |                       |
| <i>pH</i>         |                           |                          |                         |                       |
| <i>T</i> (°C)     | 0.0189                    | 0.0081                   | 0.0044                  |                       |
| <i>Urea</i> (M)   |                           | 0.0054                   | 0.0028                  |                       |
| <i>Time</i> (h)   |                           |                          |                         |                       |
| <i>DTT</i> (mM)   |                           |                          |                         |                       |
|                   |                           |                          |                         |                       |
|                   | <b>αS1CN-FFVAPFPEVFGK</b> | <b>αS1CN-YLGYLEQLLR</b>  |                         |                       |
| <i>AmBic</i> (mM) |                           |                          |                         |                       |
| <i>pH</i>         |                           |                          |                         |                       |
| <i>T</i> (°C)     | 0.0629                    |                          |                         |                       |
| <i>Urea</i> (M)   | 0                         | 0.0692                   |                         |                       |
| <i>Time</i> (h)   |                           |                          |                         |                       |
| <i>DTT</i> (mM)   |                           |                          |                         |                       |
|                   |                           |                          |                         |                       |
|                   | <b>βCN-AVPYPQR</b>        | <b>βCN-VLPVPQK</b>       |                         |                       |
| <i>AmBic</i> (mM) |                           |                          |                         |                       |
| <i>pH</i>         |                           |                          |                         |                       |
| <i>T</i> (°C)     | 0.0445                    | 0.0255                   |                         |                       |
| <i>Urea</i> (M)   | 0                         | 0                        |                         |                       |
| <i>Time</i> (h)   |                           |                          |                         |                       |
| <i>DTT</i> (mM)   |                           |                          |                         |                       |
|                   |                           |                          |                         |                       |
|                   | <b>κ-CN-YIPQYVLSR</b>     |                          |                         |                       |
| <i>AmBic</i> (mM) |                           |                          |                         |                       |
| <i>pH</i>         |                           |                          |                         |                       |
| <i>T</i> (°C)     |                           |                          |                         |                       |
| <i>Urea</i> (M)   | 0                         |                          |                         |                       |
| <i>Time</i> (h)   |                           |                          |                         |                       |
| <i>DTT</i> (mM)   |                           |                          |                         |                       |
|                   |                           |                          |                         |                       |
|                   | <b>Ova-GLWEK</b>          | <b>Ova-HIATNAVLFFGR</b>  | <b>Ova-LYAEER</b>       |                       |
| <i>AmBic</i> (mM) |                           |                          |                         |                       |
| <i>pH</i>         |                           |                          |                         |                       |
| <i>T</i> (°C)     |                           |                          |                         |                       |
| <i>Urea</i> (M)   | 0                         | 0.0001                   | 0.0051                  |                       |
| <i>Time</i> (h)   |                           |                          |                         |                       |
| <i>DTT</i> (mM)   |                           |                          |                         |                       |
|                   |                           |                          |                         |                       |
|                   | <b>Lys-HGLDNYR</b>        | <b>Lys-FESNFNTQATNR</b>  | <b>Lys-GTDVQAWIR</b>    |                       |
| <i>pH</i>         |                           |                          |                         |                       |
| <i>AmBic</i> (mM) |                           |                          |                         |                       |
| <i>T</i> (°C)     |                           | 0.0217                   | 0.0095                  |                       |
| <i>Urea</i> (M)   | 0.0008                    | 0                        | 0.0006                  |                       |
| <i>Time</i> (h)   |                           |                          |                         |                       |
| <i>DTT</i> (mM)   |                           |                          |                         |                       |

**Table S4** Individual p-values for the Central Composite Design of the extraction. \*interaction  
- Indication of the quadratic effect of the Urea concentration

|                 |                           |                          |                         |                       |
|-----------------|---------------------------|--------------------------|-------------------------|-----------------------|
|                 | <b>αS2CN-VIPYVP</b>       | <b>αS2CN-ALNEINQFYQK</b> | <b>αS2CN-NAVPIPTLNR</b> | <b>αS2CN-FALPQYLK</b> |
| <i>T</i> (°C)   |                           |                          |                         |                       |
| <i>Urea</i> (M) |                           |                          |                         |                       |
|                 | <b>βLG-IPAVFK</b>         | <b>βLG-ALPHMIR</b>       | <b>βLG-GLDIQK</b>       |                       |
| <i>T</i> (°C)   |                           |                          |                         |                       |
| <i>Urea</i> (M) | 0.0055                    | 0.0009                   |                         |                       |
|                 | <b>αS1CN-FFVAPFPEVFGK</b> | <b>αS1CN-YLGYLEQLLR</b>  |                         |                       |
| <i>T</i> (°C)   |                           |                          |                         |                       |
| <i>Urea</i> (M) | 0.0071                    |                          |                         |                       |
|                 | <b>βCN-AVPYPQR</b>        | <b>βCN-VLPVPQK</b>       |                         |                       |
| <i>T</i> (°C)   |                           |                          |                         |                       |
| <i>Urea</i> (M) |                           | B*B interaction          |                         |                       |
|                 |                           | 0.0032                   |                         |                       |
|                 | <b>κ-CN-YIPIQYVLSR</b>    |                          |                         |                       |
| <i>T</i> (°C)   |                           |                          |                         |                       |
| <i>Urea</i> (M) |                           |                          |                         |                       |
|                 | <b>Ova-GLWEK</b>          | <b>Ova-HIATNAVLFFGR</b>  | <b>Ova-LYAEER</b>       |                       |
| <i>T</i> (°C)   | 0.0410                    | 0.0122                   |                         |                       |
| <i>Urea</i> (M) | 0.0001                    | 0                        | 0.0472                  |                       |
|                 | <b>Lys-HGLDNYR</b>        | <b>Lys-FESNFNTQATNR</b>  | <b>Lys-GTDVQAWIR</b>    |                       |
| <i>T</i> (°C)   | 0.0044                    | 0.0006                   | 0.0322                  |                       |
| <i>Urea</i> (M) | 0.0003                    | 0                        | 0.0005                  |                       |

**Table S5** Individual p-values for the Full Factorial Design of the digestion

|                   | <b>αS2CN-VIPYVP</b>       | <b>αS2CN-ALNEINQFYQK</b> | <b>αS2CN-NAVPIPTLNR</b> | <b>αS2CN-FALPQYLK</b> |
|-------------------|---------------------------|--------------------------|-------------------------|-----------------------|
| <i>Time (h)</i>   |                           | 0.094871                 | 0.041105                |                       |
| <i>AmBic (mM)</i> | 0.028126                  |                          | 0.000520                |                       |
| <i>DTT (mM)</i>   |                           | 0.028083                 | 0.002752                |                       |
| <i>AcN (%)</i>    |                           | 0.012932                 |                         | 0.009966              |
| <i>DMSO (%)</i>   | 0.075594                  |                          | 0.009483                |                       |
|                   |                           |                          |                         |                       |
|                   | <b>βLG-IPAVFK</b>         | <b>βLG-ALPHMIR</b>       | <b>βLG-GLDIQK</b>       |                       |
| <i>Time (h)</i>   | 0.014354                  |                          |                         |                       |
| <i>AmBic (mM)</i> | 0.068737                  |                          |                         |                       |
| <i>DTT (mM)</i>   | 0.010727                  | 0.034035                 |                         |                       |
| <i>AcN (%)</i>    | 0.021182                  |                          |                         |                       |
| <i>DMSO (%)</i>   |                           |                          |                         |                       |
|                   |                           |                          |                         |                       |
|                   | <b>αS1CN-FFVAPFPEVFGK</b> | <b>αS1CN-YLGYLEQLLR</b>  |                         |                       |
| <i>Time (h)</i>   |                           |                          |                         |                       |
| <i>AmBic (mM)</i> |                           |                          |                         |                       |
| <i>DTT (mM)</i>   | 0.026569                  |                          |                         |                       |
| <i>AcN (%)</i>    | 0.014339                  | 0.007933                 |                         |                       |
| <i>DMSO (%)</i>   |                           |                          |                         |                       |
|                   |                           |                          |                         |                       |
|                   | <b>βCN-AVPYPQR</b>        | <b>βCN-VLPVPQK</b>       |                         |                       |
| <i>Time (h)</i>   |                           |                          |                         |                       |
| <i>AmBic (mM)</i> | 0.033713                  |                          |                         |                       |
| <i>DTT (mM)</i>   |                           |                          |                         |                       |
| <i>AcN (%)</i>    |                           |                          |                         |                       |
| <i>DMSO (%)</i>   |                           | 0.312077                 |                         |                       |
|                   |                           |                          |                         |                       |
|                   | <b>κCN-YIPIQYVLSR</b>     |                          |                         |                       |
| <i>Time (h)</i>   |                           |                          |                         |                       |
| <i>AmBic (mM)</i> | 0.000631                  |                          |                         |                       |
| <i>DTT (mM)</i>   |                           |                          |                         |                       |
| <i>AcN (%)</i>    |                           |                          |                         |                       |
| <i>DMSO (%)</i>   |                           |                          |                         |                       |
|                   |                           |                          |                         |                       |
|                   | <b>Ova-GLWEK</b>          | <b>Ova-HIATNAVLFFGR</b>  | <b>Ova-LYAEER</b>       |                       |
| <i>Time (h)</i>   | 0.014089                  | 0.000003                 |                         |                       |
| <i>AmBic (mM)</i> | 0.002194                  | 0.000555                 |                         |                       |
| <i>DTT (mM)</i>   | 0.010079                  | 0.019807                 |                         |                       |
| <i>AcN (%)</i>    |                           | 0.000100                 |                         |                       |
| <i>DMSO (%)</i>   | 0.026843                  |                          |                         |                       |
|                   |                           |                          |                         |                       |
|                   | <b>Lys-HGLDNYR</b>        | <b>Lys-FESNFNTQATNR</b>  | <b>Lys-GTDVQAWIR</b>    |                       |
| <i>Time (h)</i>   |                           | 0.001023                 | 0.015481                |                       |
| <i>AmBic (mM)</i> |                           | 0.090525                 | 0.067819                |                       |
| <i>DTT (mM)</i>   |                           | 0.000329                 | 0.020531                |                       |
| <i>AcN (%)</i>    |                           |                          |                         |                       |
| <i>DMSO (%)</i>   |                           | 0.001909                 | 0.071218                |                       |

**Table S6** Individual p-values for the central composite design of the digestion. \*interaction - Indication of the quadratic effect of the factor A= AmBic (mM); C=DMSO (%)

|                   | <b>αS2CN-VIPYVP</b>       | <b>αS2CN-ALNEINQFYQK</b> | <b>αS2CN-NAVPITPTLNR</b> | <b>αS2CN-FALPQYLK</b> |
|-------------------|---------------------------|--------------------------|--------------------------|-----------------------|
| <i>AmBic (mM)</i> |                           | 0                        |                          |                       |
| <i>DTT (mM)</i>   |                           |                          |                          |                       |
| <i>DMSO (%)</i>   |                           | 0.0026                   |                          |                       |
| <i>Time (h)</i>   |                           | 0.0020                   | 0.0068                   |                       |
|                   |                           | A*C                      |                          |                       |
|                   | <b>βLG-IPAVFK</b>         | <b>βLG-ALPHMIR</b>       | <b>βLG-GLDIQK</b>        |                       |
| <i>AmBic (mM)</i> |                           |                          |                          |                       |
| <i>DTT (mM)</i>   |                           |                          |                          |                       |
| <i>DMSO (%)</i>   |                           |                          | 0.0077                   |                       |
| <i>Time (h)</i>   |                           |                          |                          |                       |
|                   | <b>αS1CN-FFVAPFPEVFGK</b> | <b>αS1CN-YLGYLEQLLR</b>  |                          |                       |
| <i>AmBic (mM)</i> |                           | 0.0015                   |                          |                       |
| <i>DTT (mM)</i>   |                           |                          |                          |                       |
| <i>DMSO (%)</i>   |                           |                          |                          |                       |
| <i>Time (h)</i>   |                           |                          |                          |                       |
|                   | <b>βCN-AVPYPQR</b>        | <b>βCN-VLPVPQK</b>       |                          |                       |
| <i>AmBic (mM)</i> |                           |                          |                          |                       |
| <i>DTT (mM)</i>   |                           |                          |                          |                       |
| <i>DMSO (%)</i>   | 0.001500                  |                          |                          |                       |
| <i>Time (h)</i>   |                           |                          |                          |                       |
|                   | C*C                       | C*C                      |                          |                       |
|                   | <b>κCN-YIPIQYVLSR</b>     |                          |                          |                       |
| <i>AmBic (mM)</i> |                           |                          |                          |                       |
| <i>DTT (mM)</i>   |                           |                          |                          |                       |
| <i>DMSO (%)</i>   |                           |                          |                          |                       |
| <i>Time (h)</i>   |                           |                          |                          |                       |
|                   | <b>Ova-GLWEK</b>          | <b>Ova-HIATNAVLFFGR</b>  | <b>Ova-LYAEER</b>        |                       |
| <i>AmBic (mM)</i> | 0.0071                    | 0.0024                   | 0.0000                   |                       |
| <i>DTT (mM)</i>   |                           |                          |                          |                       |
| <i>DMSO (%)</i>   |                           |                          | 0.0000                   |                       |
| <i>Time (h)</i>   |                           |                          | 0.0000                   |                       |
|                   | C*C                       |                          | C*C                      |                       |
|                   | <b>Lys-HGLDNYR</b>        | <b>Lys-FESNFNTQATNR</b>  | <b>Lys-GTDVQAWIR</b>     |                       |
| <i>AmBic (mM)</i> |                           | 0.0048                   | 0.0002                   |                       |
| <i>DTT (mM)</i>   |                           |                          |                          |                       |
| <i>DMSO (%)</i>   |                           |                          |                          |                       |
| <i>Time (h)</i>   |                           |                          | 0.0038                   |                       |
